# Supplementary material
Source: Springer Nature journal article supplement (https://www.springermedizin.de/resource/supplementary/12939_2013_372_MOESM1_ESM.pdf/9551006)
Supplement: MOESM1 [file 9551006]

**Potentially eligible** (n=7461)

Māori 3116, Non-Māori 4345

**Invited\*** (n=4671)

Māori 2040 (65%), Non-Māori 2631 (61%)

**Registered\*** (1069)

Māori 462 (15%), Non-Māori 370 (9%), Unknown ethnicity 237

**Consented\*** (n=814)

Māori 453 (15%), Non-Māori 361 (8%)

**Excluded\*** (n=301)

Māori 196 (6%), Non-Māori 105 (2%)

**Randomized\*** (n=513)

Māori 257 (8%), non-Māori 256 (6%)
